# Supplementary material for: A Time to Event Tutorial for Pharmacometricians
Source: PubMed Central journal article supplement — CPT Pharmacometrics Syst Pharmacol. 2013 May 15;2(5):e43–. doi: 10.1038/psp.2013.18 (PMC3674328; doi:10.1038/psp.2013.18), 2013-05-15
Supplement: psp201318x1.pdf [file psp201318x1.pdf]

Table 1 Pharmacokinetic and survival approaches describing the time course of drug (initial amount 100 mass units or 100 molecules;  $v_{max}=100$ ;  $k_m=50$ ;  $k=v_{max}/k_m$ )

| Time | First-order |          | Mixed-Order |          |
|------|-------------|----------|-------------|----------|
|      | Amount      | Survival | Amount      | Survival |
| 0    | 100.000     | 100.000  | 100.000     | 100.000  |
| 1    | 13.534      | 13.534   | 42.630      | 42.630   |
| 2    | 1.832       | 1.832    | 10.886      | 10.886   |
| 3    | 0.248       | 0.248    | 1.768       | 1.768    |
| 4    | 0.034       | 0.034    | 0.247       | 0.247    |
| 5    | 0.005       | 0.005    | 0.034       | 0.034    |
