# Supplementary material for: A Time to Event Tutorial for Pharmacometricians
Source: PubMed Central journal article supplement — CPT Pharmacometrics Syst Pharmacol. 2013 May 15;2(5):e43–. doi: 10.1038/psp.2013.18 (PMC3674328; doi:10.1038/psp.2013.18), 2013-05-15
Supplement: psp201318x3.pdf [file psp201318x3.pdf]

Table 3 Likelihood of an event

| Observation       | Likelihood                  | Event Time                                     |
|-------------------|-----------------------------|------------------------------------------------|
| Exact time        | $S(t) \times h(t)$          | Event occurs at time $t$                       |
| Interval censored | $S(t_{start}) - S(t_{end})$ | Event occurs between $t_{start}$ and $t_{end}$ |
| Right censored    | $S(t)$                      | Event has not occurred at time $t$             |
