# Supplementary material for: A Time to Event Tutorial for Pharmacometricians
Source: PubMed Central journal article supplement — CPT Pharmacometrics Syst Pharmacol. 2013 May 15;2(5):e43–. doi: 10.1038/psp.2013.18 (PMC3674328; doi:10.1038/psp.2013.18), 2013-05-15
Supplement: psp201318x4.pdf [file psp201318x4.pdf]

**Table 1 Pharmacokinetic and survival approaches describing the time course of drug (initial amount 100 mass units or 100 molecules; v<sub>max</sub>=100; k<sub>m</sub>=50; k=v<sub>max</sub>/k<sub>m</sub>)**

| Time | First-order |          | Mixed-Order |          |
|------|-------------|----------|-------------|----------|
|      | Amount      | Survival | Amount      | Survival |
| 0    | 100.000     | 100.000  | 100.000     | 100.000  |
| 1    | 13.534      | 13.534   | 42.630      | 42.630   |
| 2    | 1.832       | 1.832    | 10.886      | 10.886   |
| 3    | 0.248       | 0.248    | 1.768       | 1.768    |
| 4    | 0.034       | 0.034    | 0.247       | 0.247    |
| 5    | 0.005       | 0.005    | 0.034       | 0.034    |

**Table 2 The exponential family of hazard functions and corresponding named distributions**

| Hazard                                                                                      | Distribution                   |             |
|---------------------------------------------------------------------------------------------|--------------------------------|-------------|
| $h = \lambda_0 \times e^0$                                                                  | Exponential                    | Equation 17 |
| $h(t) = \lambda_0 \times e^{\beta \times t}$                                                | Gompertz                       | Equation 18 |
| $h(t) = \lambda_0 \times e^{\beta \times \ln(t)}$                                           | Weibull                        | Equation 19 |
| $h(X_1, X_2, \dots) = \lambda_0 \times e^{\beta_1 \times X_1 + \beta_2 \times X_2 + \dots}$ | Generalized exponential hazard | Equation 20 |

**Table 3 Likelihood of an event**

| Observation       | Likelihood                  | Event Time                                     |
|-------------------|-----------------------------|------------------------------------------------|
| Exact time        | $S(t) \times h(t)$          | Event occurs at time $t$                       |
| Interval censored | $S(t_{start}) - S(t_{end})$ | Event occurs between $t_{start}$ and $t_{end}$ |
| Right censored    | $S(t)$                      | Event has not occurred at time $t$             |

Berkeley Madonna Code Illustrating Constant, Gompertz and Weibull Hazard Functions

METHOD stiff

STARTTIME = 0

STOPTIME=100

DT = 0.001

DTOUT=1

iswb=0 ; use Weibull hazard

isgm=0 ; use Gompertz hazard

istci=1 ; use doses to reach target conc

isload=0 ; use a loading dose

;PK model parameters

dose=if istci then 0 else 100

target=20 ; target concentration

duration=52 ; duration of treatment

tabs=1 ; absorption half-life

cl=0.3 ; clearance

v=1 ; volume of distribution

;Hazard function parameters

base=if iswb then 0.01 else if isgm then 0.01 else 0.0625

betawb=if iswb then 0.51 else 0

betagm=if isgm then 0.037 else 0

betacp=if iswb then -0.025 else if isgm then -0.025 else -0.025

;PK model variables

ka=logn(2)/tabs

gutratein=ka\*gut

ldose=if isload then if istci then v\*target else 0 else 0

mdr=if istci then cl\*target\*squarepulse(0,duration) else 0

init gut=dose

init amt=ldose

init cumhaztrt=0

init cumhazpla=0

init cumRR=0

d/dt(gut)=-gutratein

d/dt(amt)=gutratein + mdr - cl\*cp

d/dt(cumhaztrt)=haztrt

d/dt(cumhazpla)=hazpla

d/dt(cumRR)=relrisk

```
cp=amt/v
consthaz=base
wbhaz=if (time=0) then 0 else exp(betawb*logn(time))
gmhaz=exp(betagm*time)

usf=base*wbhaz*gmhaz
haztrt=usf*(1+betacp*cp)
hazpla=usf

survtrt=exp(-cumhaztrt)
survpla=exp(-cumhazpla)

pdftrt=survtrt*haztrt
pdfpla=survpla*hazpla

relrisk=if cumhazpla=0 then 1 else cumhaztrt/cumhazpla
avgRR=if time=0 then 1 else cumRR/time
```

Berkeley Madonna Code Illustrating Parkinson's Disease Hazard of Mortality and Dropout with Different Treatments [1]

METHOD RK4

STARTTIME = 0

STOPTIME=8

DT = 0.02

RENAME time=year

DTOUT=0.1

;disease status model

updrststatus=1

pigdstatus=2

;hazard models

indephaz=0

cr230=2 ; Final model code

;event models

event\_DEA=0

event\_DRP=1

;disease status model choice

typestatus=1 ;updrststatus

;hazard model choice

hazmdl=0 ; indephaz=0 (death model), cr230=2 (dropout model)

;event model choice

event=0 ;event\_DEA=0, event\_DRP=1

;treatment choice codes

ld=1 ; levodopa

dp=2 ; selegiline

lddp=3 ; levodopa + selegiline

;assign treatment and selegiline treatment delay

trt=3

dplag=2

;miscellaneous choices

iscr=0 ; competing risk parameters

isPIGD=0; baseline PIGD

```
;Model Parameters
;UPDRS total disease progress
popS0[updrststatus]=20.9 ; S0 UPDRS
popRSS[updrststatus]=85.2 ; Rss UPDRS
popTP[updrststatus]=109 ; y
;Drug effects on half-time of progress
popkplt[updrststatus]=0.497 ; levodopa
popkpdt[updrststatus]=0.357 ; deprenyl
popkpbt[updrststatus]=1.11 ; bromocriptine
popkppt[updrststatus]=-0.143 ; pergolide
popkpptt[updrststatus]=0 ; tocopherol
popflxdt[updrststatus]=3.76 ; LD and DP interaction
```

```
;Offset effects of levodopa and other treatments
popem0L[updrststatus]=0 ; u
popc5L[updrststatus]=0.0291 ; 0.3g/d
popBEML[updrststatus]= -24.4 ; u
popTEML[updrststatus]=0.606 ; y
popTEQL[updrststatus]=2.82 ; y
popHill[updrststatus]=0.551
popBOD[updrststatus]= -0.401 ; u
popBOB[updrststatus]= -1.56 ; u
popBOP[updrststatus]= -0.692 ; u
```

```
;PIGD disease progress
;estimates from ??
popS0[pigdstatus]=1.51 ; u
popRSS[pigdstatus]=17.6 ; u
popTP[pigdstatus]=40.1 ; y
```

```
;Drug effects on half-time of progress
popkplt[pigdstatus]=0.659 ; levodopa
popkpdt[pigdstatus]=0.407 ; deprenyl
popkpbt[pigdstatus]=-1.18 ; bromocriptine
popkppt[pigdstatus]=0.378 ; pergolide
popkpptt[pigdstatus]=0 ; tocopherol
popflxdt[pigdstatus]=5.41 ; LD and DP interaction
```

```
;Offset effects of levodopa and other treatments
popem0L[pigdstatus]=0
popc5L[pigdstatus]=4.07
popBEML[pigdstatus]=-2.93
popTEML[pigdstatus]=0.364
popTEQL[pigdstatus]=0.525
popHill[pigdstatus]=0.51
popBOD[pigdstatus]=-0.228
popBOB[pigdstatus]=-0.499
```

```

popBOP[pigdstatus]=--0.0826

; Assign model specific parameters
S0=popS0[typestatus]
RSS=popRSS[typestatus]
TP=popTP[typestatus]
kplt=popkplt[typestatus]
kpdt=popkpdt[typestatus]
flxdt=popflxdt[typestatus]
kpbt=popkpbt[typestatus]
kppt=popkppt[typestatus]
kptt=popkptt[typestatus]
em0L=popem0L[typestatus]
c5L=popc5L[typestatus]
BEML=popBEML[typestatus]
TEML=popTEML[typestatus]
TEQL=popTEQL[typestatus]
Hill=popHill[typestatus]
BOD=popBOD[typestatus]
BOB=popBOB[typestatus]
BOP=popBOP[typestatus]

isld=if (trt=ld or trt=lddp) then 1 else 0
isdp=if (trt=dp or trt=lddp) then 1 else 0
isdplag=if (year>dplag+0.1) then 1 else 0

;Treatment relative to median daily dose
CPL=isld ; 1=300 mg/day levodopa
CPD=isd*isdplag ; 1=10 mg/day deprenyl
CPB=0 ; 1=15 mg/day bromocriptine
CPP=0 ; 1=1.25 mg/day pergolide
CPT=0 ; 1= tocopherol

age0=60
age=age0+year

;Hazard function for event
;Independent Risks for death
popBASEGM[indephaz,event_DEA]=1.28 * 1e-5
popBTIME[indephaz,event_DEA]=0.127
popBAGE[indephaz,event_DEA]=0.0649
popBETASTATUS[indephaz,event_DEA]=0.0336
popBETADP[indephaz,event_DEA]=0.931

popBASEGM2[indephaz,event_DEA]=0
popBTIM2[indephaz,event_DEA]=0
popBLNTIM[indephaz,event_DEA]=0

```

```
popBETALD[indephaz,event_DEA]=0
popBETAPIGD[indephaz,event_DEA]=0
popBASEWB[indephaz,event_DEA]=0
```

```
;Dropout model parameters for death events as a cause of dropout
```

```
popBASEGM[cr230,event_DEA]=0.861*1e-9
popBTIME[cr230,event_DEA]=2.86
popBASEGM2[cr230,event_DEA]=0
popBTIM2[cr230,event_DEA]=0
popBETALD[cr230,event_DEA]=0
popBETADP[cr230,event_DEA]=0.581
popBETASTATUS[cr230,event_DEA]=0.00826
popBETAPIGD[cr230,event_DEA]=0
popBASEWB[cr230,event_DEA]=35.9*1e-3
popBLNTIM[cr230,event_DEA]=1.35
popBAGE[cr230,event_DEA]=0
```

```
;Dropout model parameters for non-death events as a cause of dropout
```

```
popBASEGM[cr230,event_DRP]=76.4*1e-3
popBTIME[cr230,event_DRP]=-0.417
popBASEGM2[cr230,event_DRP]=0.0525*1e-9
popBTIM2[cr230,event_DRP]=3.4
popBETALD[cr230,event_DRP]=0
popBETADP[cr230,event_DRP]=-1.6
popBETASTATUS[cr230,event_DRP]=0.0391
popBETAPIGD[cr230,event_DRP]=0
popBASEWB[cr230,event_DRP]=0.303*1e-3
popBLNTIM[cr230,event_DRP]=2.99
popBAGE[cr230,event_DRP]=0
```

```
;Assign hazard parameters
```

```
basegm=popBASEGM[hazmdl,event] ; baseline events/year
btime=popBTIME[hazmdl,event] ; 1/year
basegm2=popBASEGM2[hazmdl,event] ; baseline events/year
btime2=popBTIM2[hazmdl,event] ; 1/year
betald=popBETALD[hazmdl,event] ; 1/300 mg/day
betadp=popBETADP[hazmdl,event] ; 1/10 mg/day
betastatus=popBETASTATUS[hazmdl,event] ; 1/UPDRS
betaPIGD=popBETAPIGD[hazmdl,event] ; Baseline subtype
basewb=popBASEWB[hazmdl,event]
blntim=popBLNTIM[hazmdl,event] ; 1/ln(year)
bage=popBAGE[hazmdl,event] ; 1/year
```

```
piCR=if iscr then 0.122 else 1 ; competing risk prob of event
```

;Model Variables

fplt=exp(CPL\*kplt)  
fpdt=exp(CPD\*kpdt)  
fpt=exp(CPT\*kppt)  
fpp=exp(CPP\*kppt)  
fpb=exp(CPB\*kpbt)

FPLD=if (CPL> 0 and CPD>0) then flxdt\*fplt\*fpdt else if CPL>0  
then fplt else if CPD>0 then fpdt else 1

EML=EM0L + BEML\*(1-exp(-logn(2)/TEML\*year))  
Offset=EML\*CeL^Hill/(C5L^Hill + CeL^Hill) + CPD\*BOD + CPB\*BOB +  
CPP\*BOP

TrtStatus=Offset + Treated  
PlaStatus=NatHist

lntime=if year<=0 then 1e-10 else logn(year)  
gompertz=btime\*year  
hage=bage\*age  
hld=if CPL>0 then CeL\*betald else 0  
hdp=if CPD>0 then betadp else 0  
hPIGD=if isPIGD then betaPIGD else 0  
hgm=btime\*year+hage+hPIGD  
hgm2=btime2\*year  
hwb=blntim\*lntime

isgm1=1  
isgm2=1  
iswb=if year<=0 then 0 else 1  
HazPla=isgm1\*basegm\*exp(hgm+betastatus\*PlaStatus) +  
isgm2\*basegm2\*exp(hgm2) + iswb\*basewb\*exp(hwb)  
HazTrt=isgm1\*basegm\*exp(hgm+betastatus\*TrtStatus+hld+hdp) +  
isgm2\*basegm2\*exp(hgm2) + iswb\*basewb\*exp(hwb)

init NatHist=S0  
init Treated=S0  
init CeL=0  
init CumHazTrt=0  
Init CumHazPla=0

d/dt(NatHist)=logn(2)/TP\*(RSS-NatHist)\*NatHist  
d/dt(Treated)=logn(2)/(TP\*FPLD\*fpt\*fpp\*fpb)\*(RSS-  
Treated)\*Treated  
d/dt(CeL)=logn(2)/TEQL\*(CPL - CeL)

d/dt (CumHazTrt)=HazTrt  
d/dt (CumHazPla)=HazPla

probSurvivalTrt=piCR\*exp(-CumHazTrt) + 1-piCR  
probSurvivalPla=piCR\*exp(-CumHazPla) + 1-piCR  
probdensityTrt=(1-probSurvivalTrt)\*HazTrt  
probdensityPla=(1-probSurvivalPla)\*HazPla

NCumHazTrt=100\*CumHazTrt  
NCumHazPla=100\*CumHazPla  
RelRisk=if NCumHazPla>0 then NCumHazTrt/NCumHazPla else 1

1. Vu, T.C., J.G. Nutt, and N.H.G. Holford, *Disease progress and response to treatment as predictors of survival, disability, cognitive impairment and depression in Parkinson's disease*. British Journal of Clinical Pharmacology, 2012. **74**(2): p. 284-295.
